# Supplementary material for: Interleukin 12 shows a better curative effect on lung cancer than paclitaxel and cisplatin doublet chemotherapy
Source: PubMed Central journal article supplement (PMC4994391; doi:10.1186/s12885-016-2701-7), 2016-08-22

DAPI CD3 F4/80

PTX+CDDP IL-12 PTX+CDDP+IL-12 Control

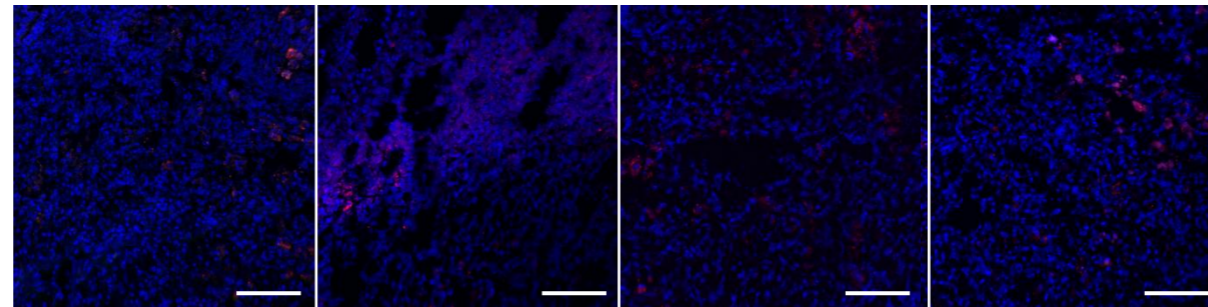

PTX+CDDP IL-12 PTX+CDDP+IL-12 Control

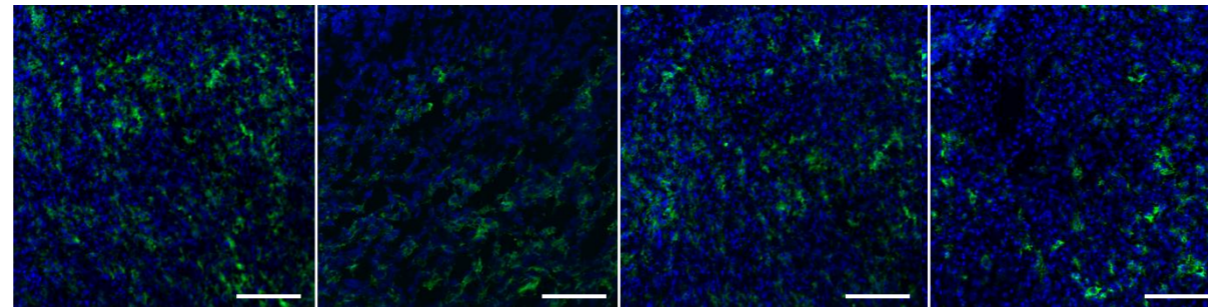

Supplement: 12885_2016_2701_MOESM4_ESM.pdf [file 12885_2016_2701_MOESM4_ESM.pdf]
